# Supplementary material for: Synthesis, linear and nonlinear optical properties of a new dimethine cyanine dye derived from phenothiazine
Source: Royal Society of Chemistry journal article supplement (doi:10.1039/c6ra13839j), 2016-01-01
Supplement: c6ra13839j1.pdf [file c6ra13839j1.pdf]

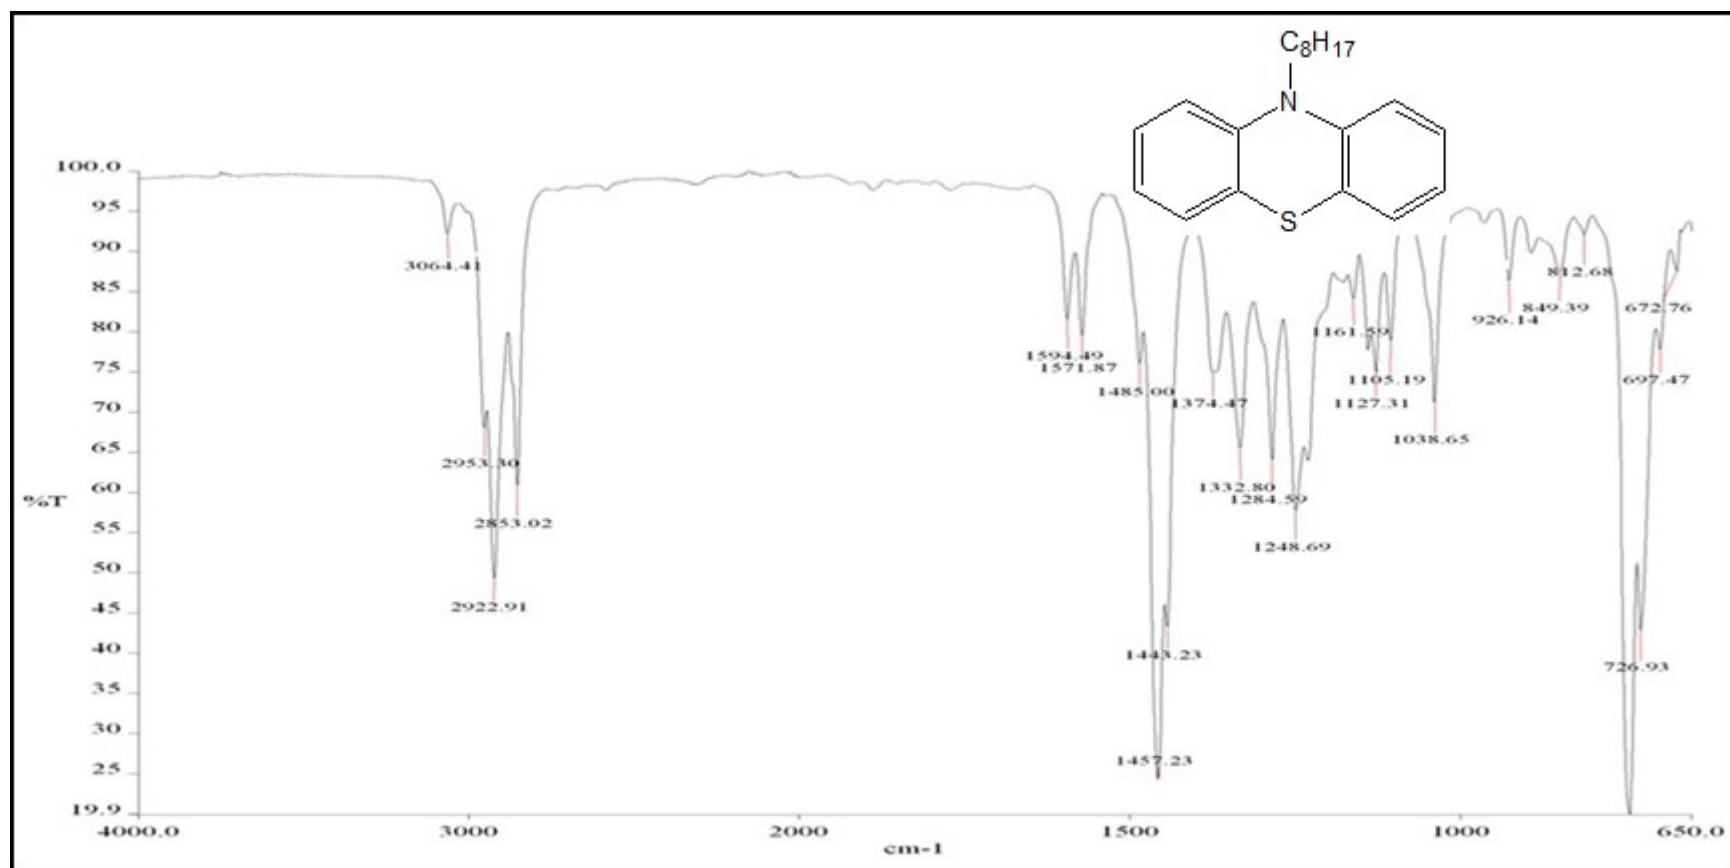

S1: IR of compound 1.

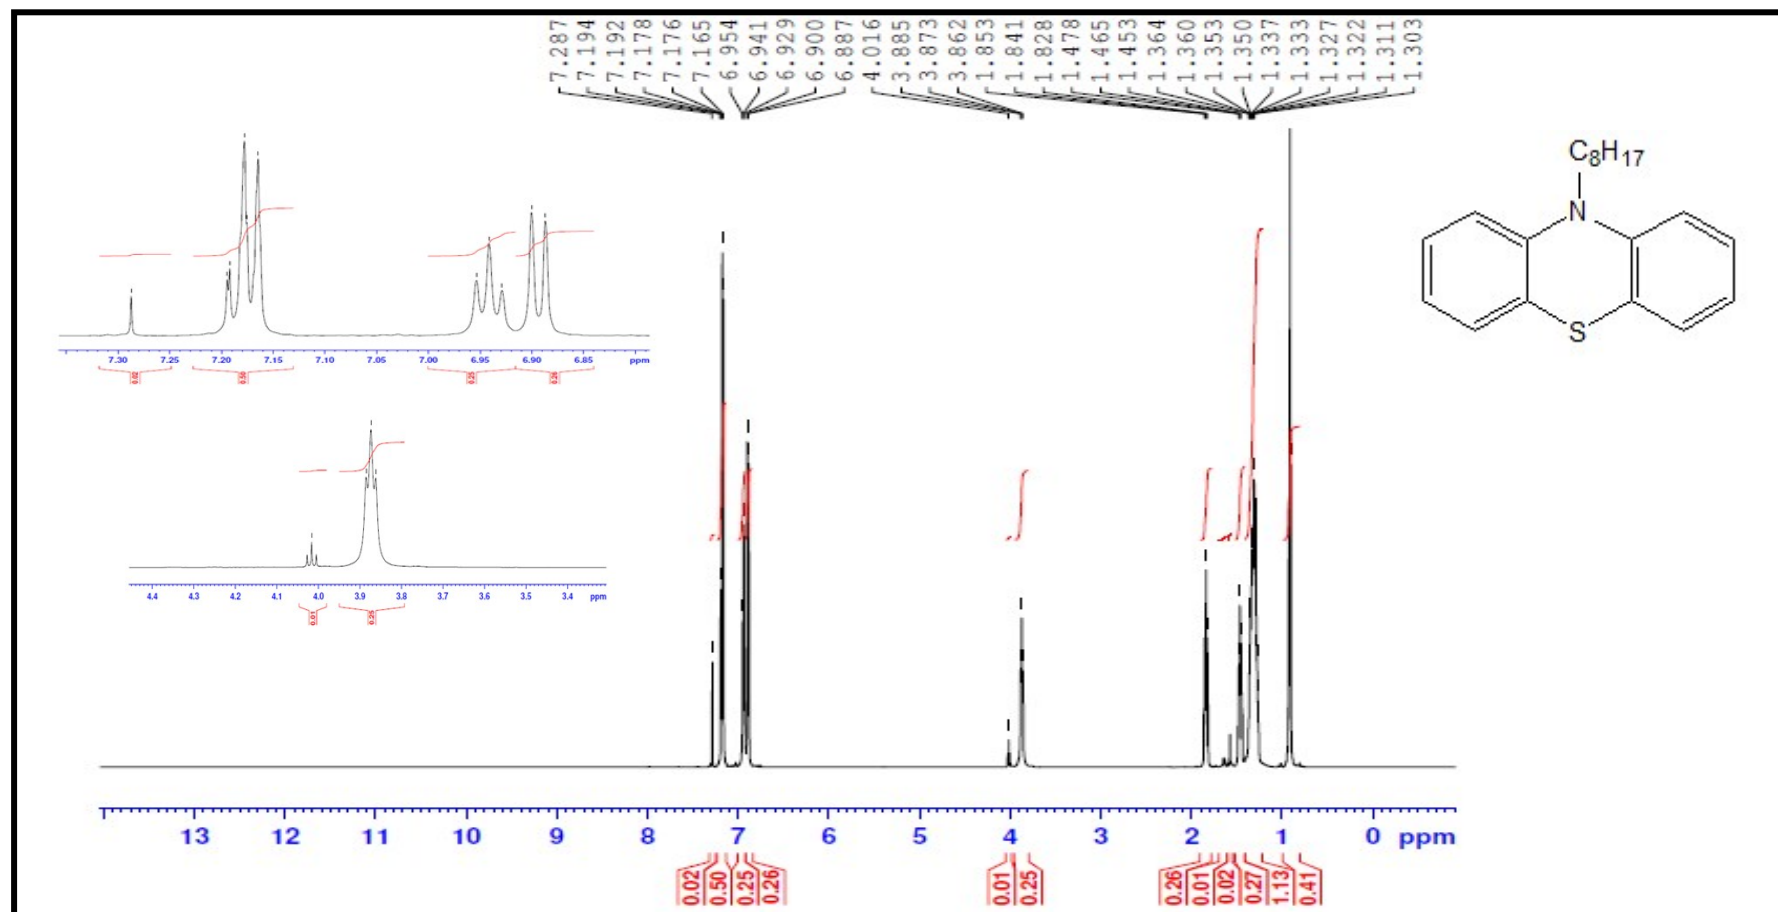

S2: <sup>1</sup>H NMR of compound 1.

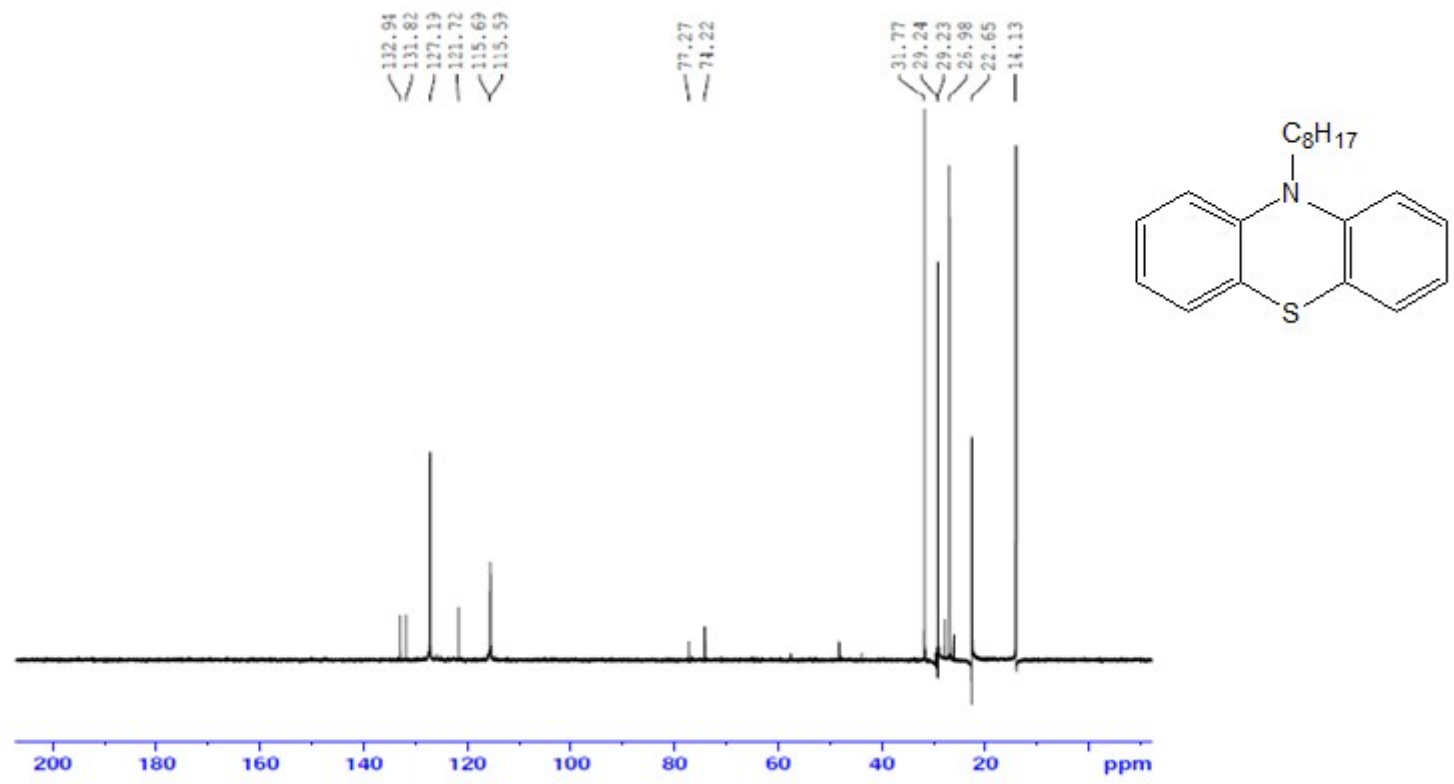

S3:  $^{13}\text{C}$  NMR of compound 1.

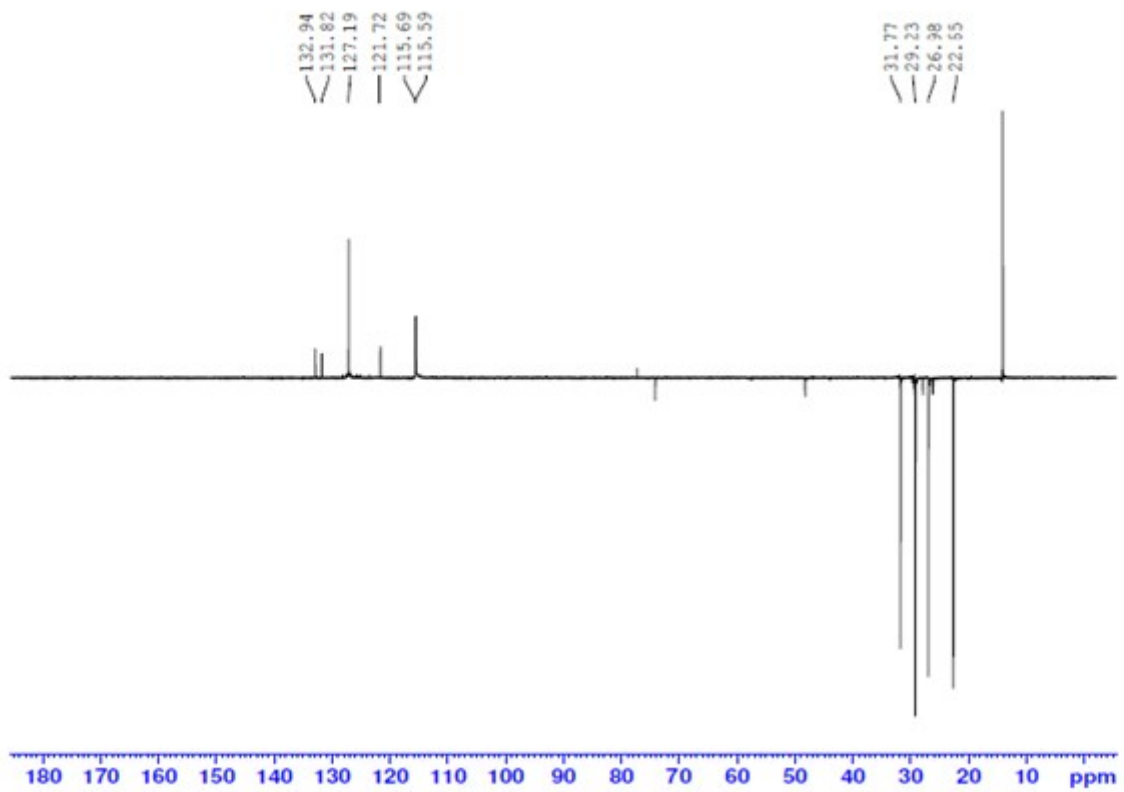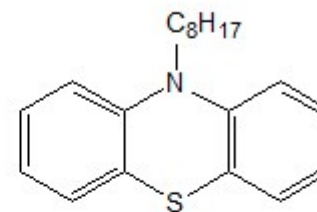

S4: Dept <sup>13</sup>C NMR of compound 1.

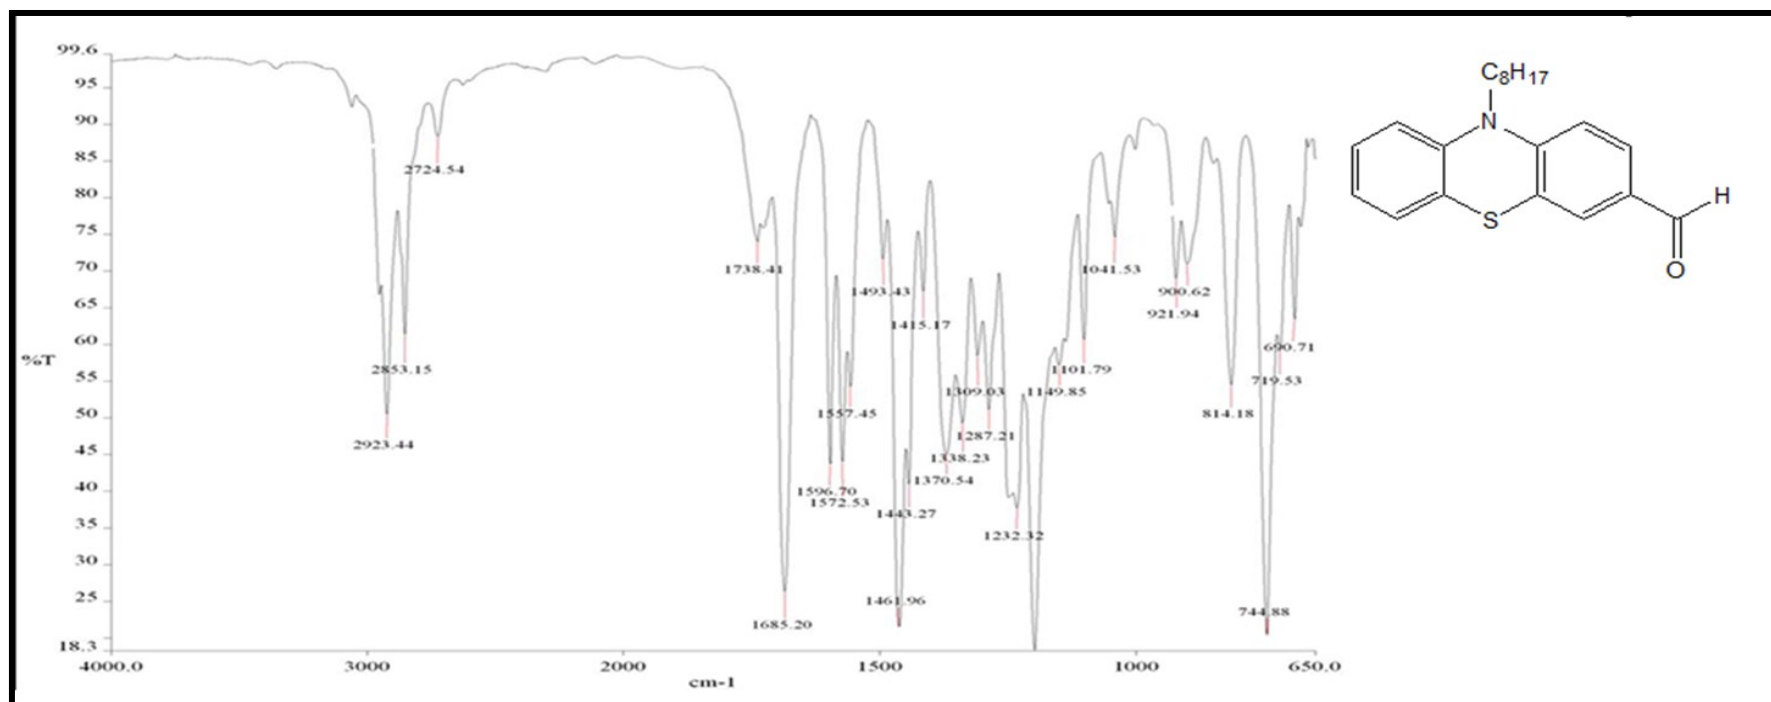

S5: IR of compound 2.

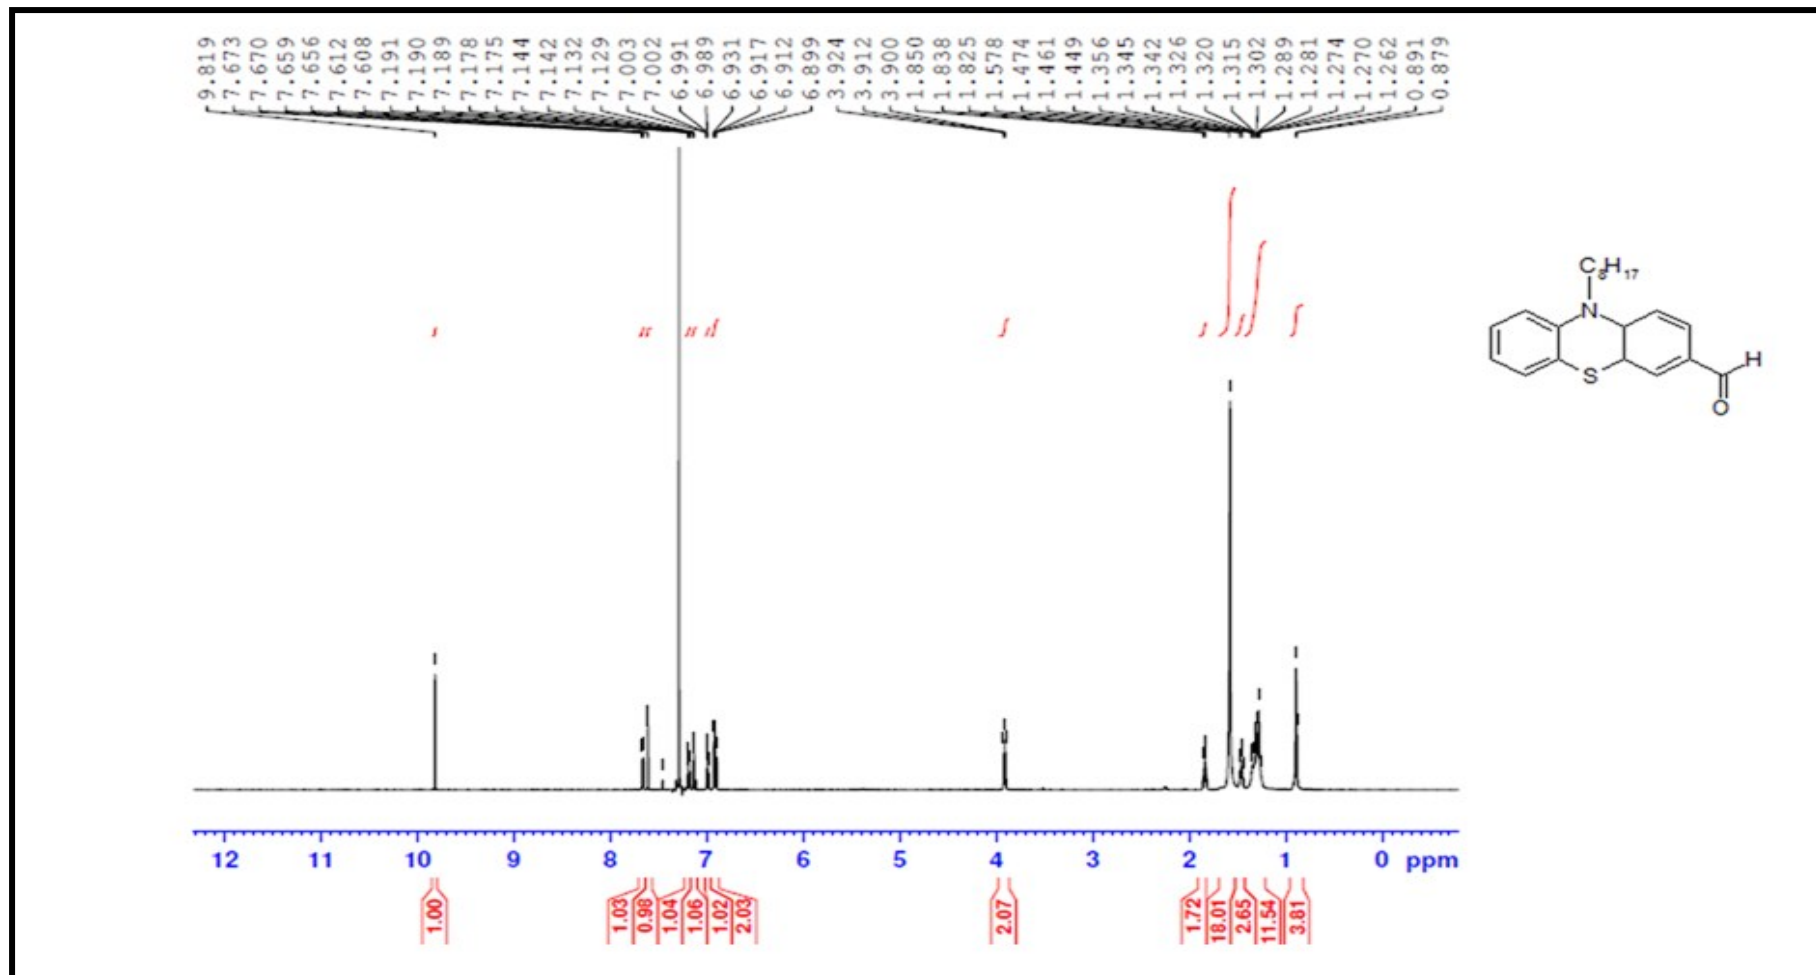

S6:  $^1\text{H NMR}$  of of compound 2.

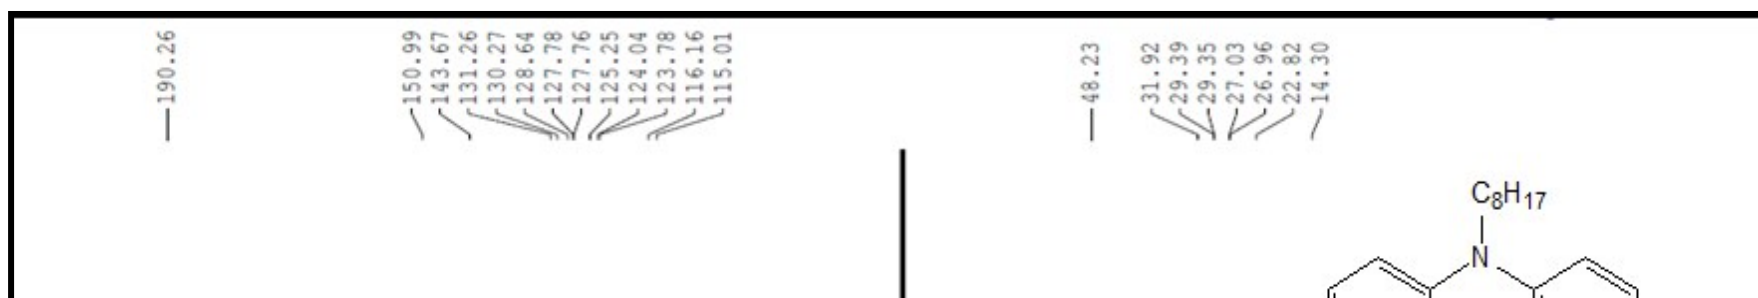

S7:  $^{13}\text{C}$  NMR of compound 2.

130.06  
128.43  
127.57  
127.54  
123.57  
115.95  
114.80

— 77.22

— 48.01  
31.71  
29.17  
29.14  
26.81  
26.75  
22.61  
14.08

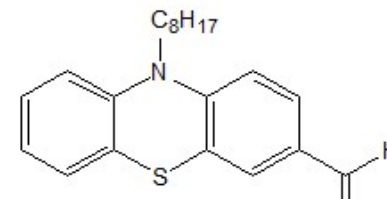

**S8:** Dept  $^{13}\text{C}$  NMR of compound **2**.



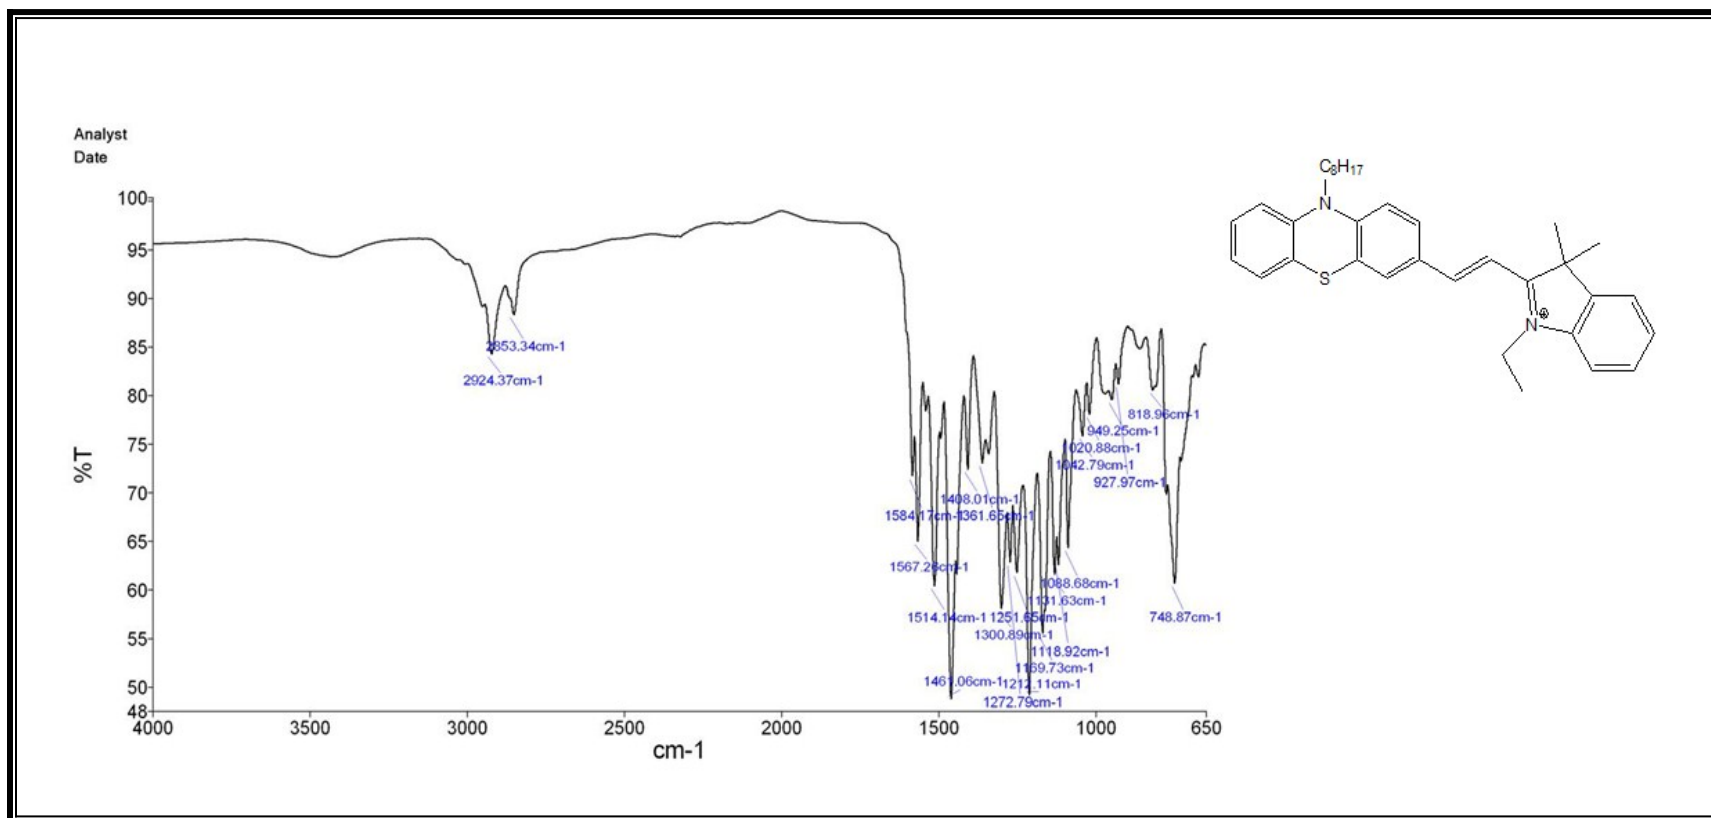

S9: IR of PTZIS.

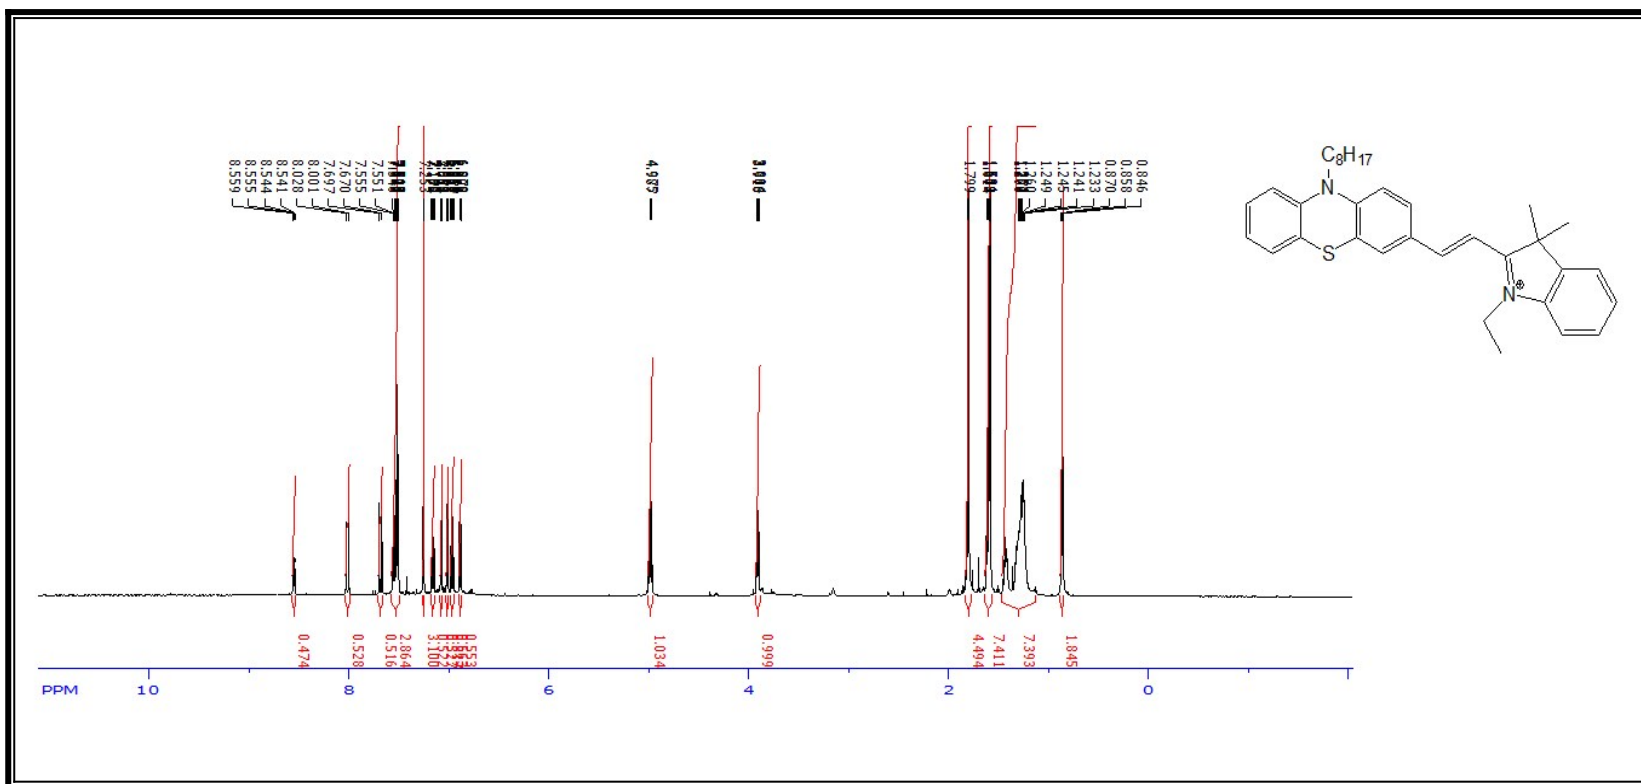

S10 :  $^1\text{H}$  NMR of PTZIS.

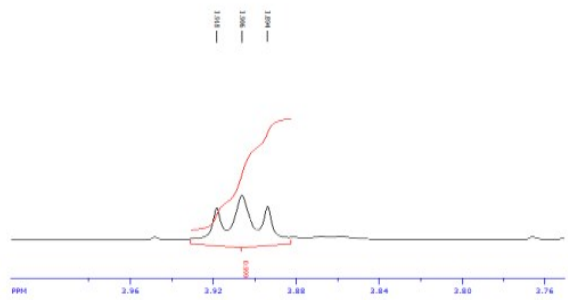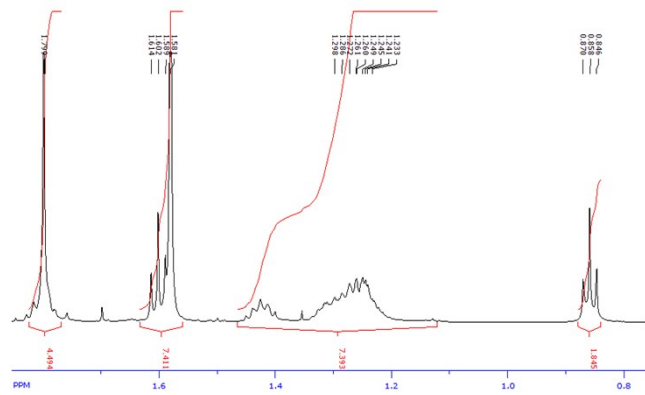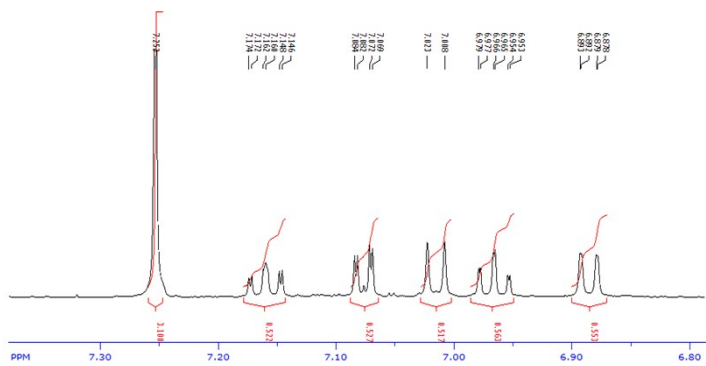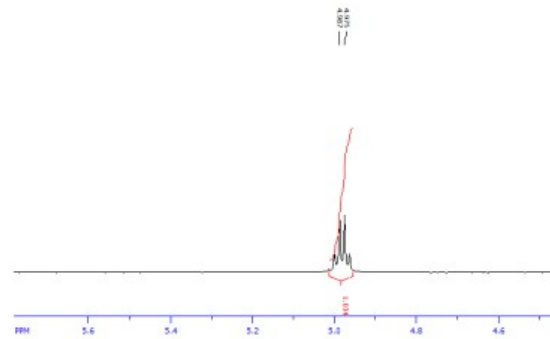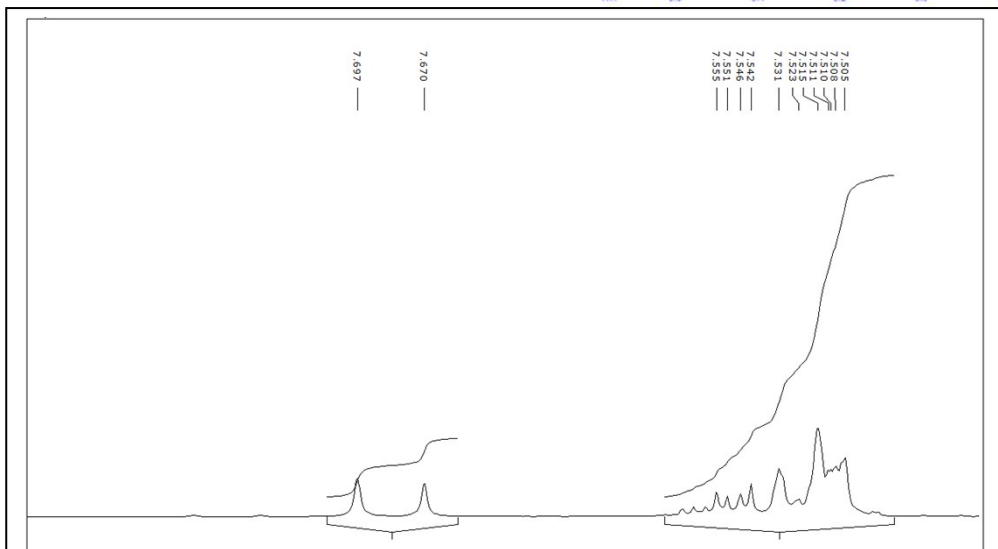

**S12 :  $^1\text{H}$  NMR of PTZIS.**

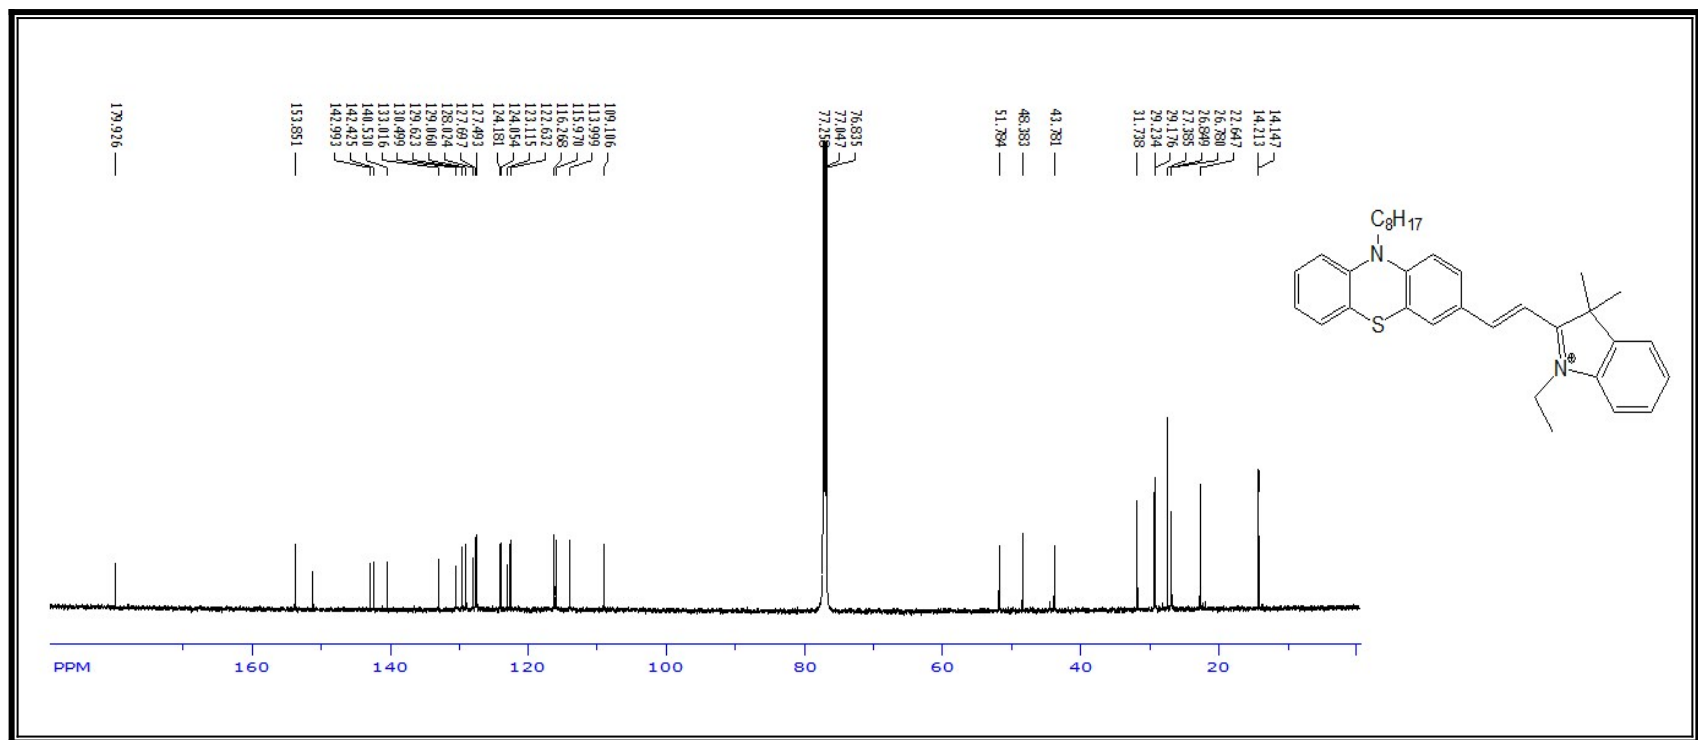

**S13:** <sup>13</sup>C NMR of (of PTZIS).

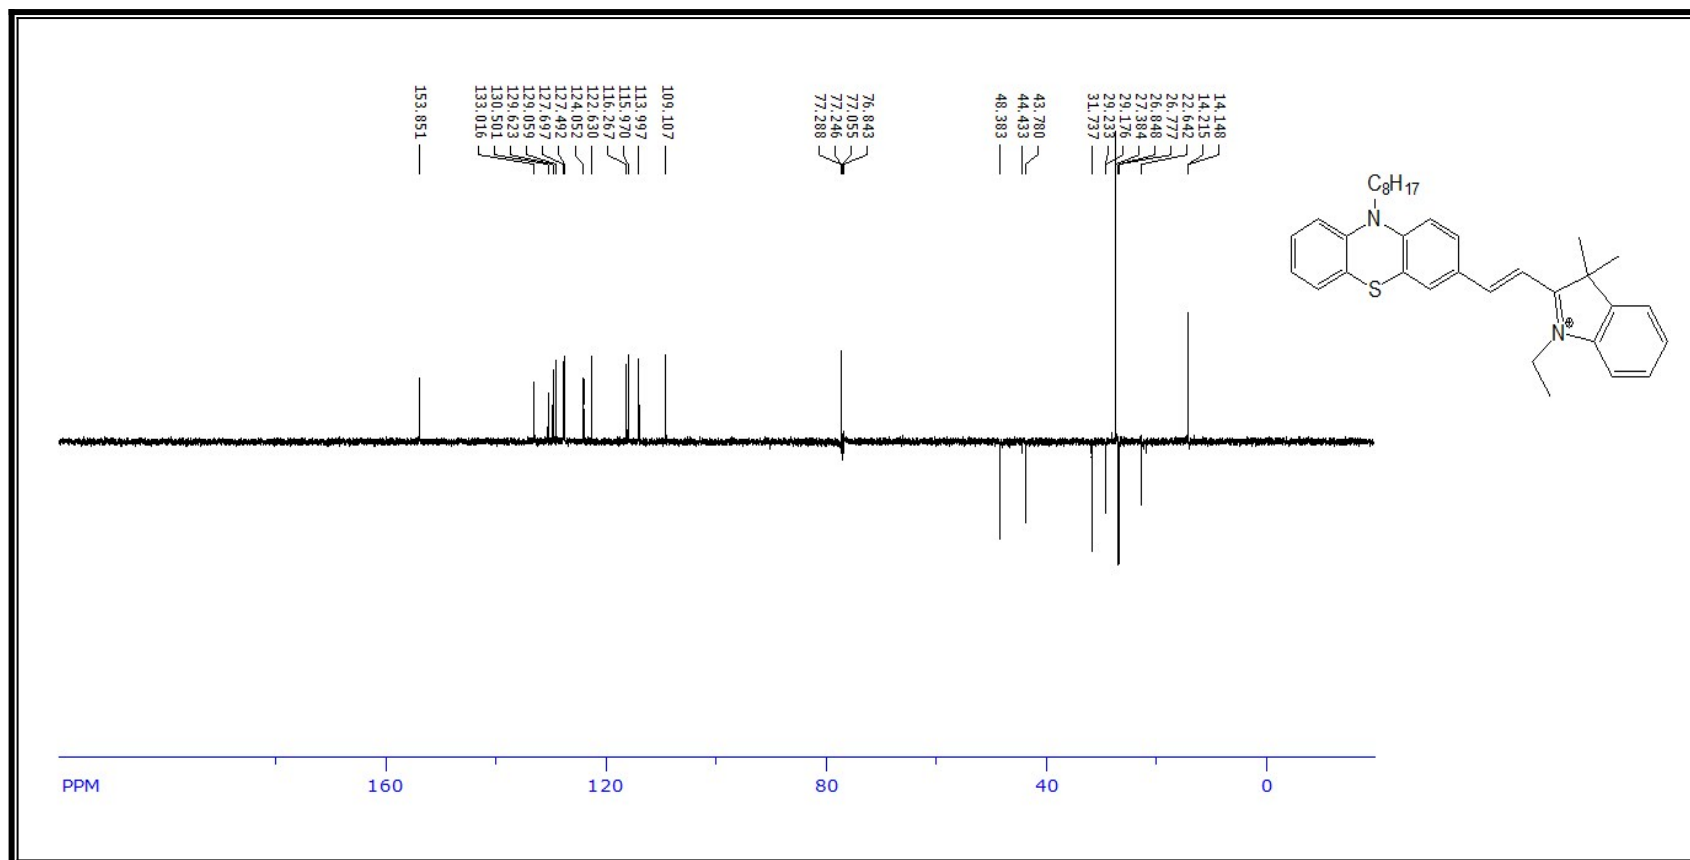

**S14:** Dept of <sup>13</sup>C NMR of PTZIS.

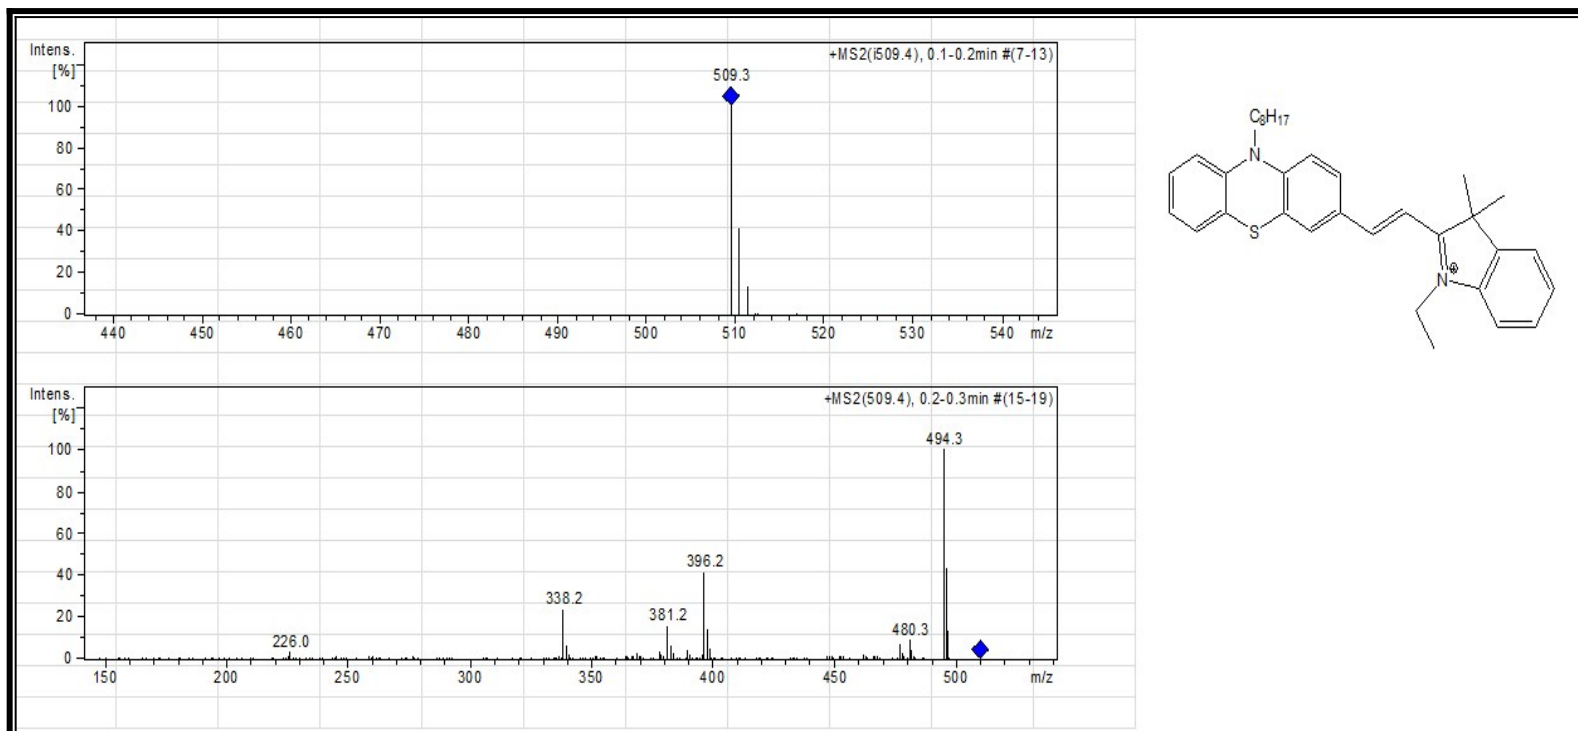

**S15: Mass of PTZIS.**
